# Supplementary material for: Ring-Opening Copolymerization of Cyclohexene Oxide and Cyclic Anhydrides Catalyzed by Bimetallic Scorpionate Zinc Catalysts
Source: MDPI journal article supplement (doi:10.3390/polym13101651), 2021-05-19

SUPPORTING INFORMATION FOR:

**Ring-Opening Copolymerization of Cyclohexene Oxide and Cyclic Anhydrides  
catalyzed by Bimetallic Scorpionate Zinc Catalysts**

*Felipe de la Cruz-Martínez<sup>1</sup>, Marc Martínez de Sarasa Buchaca<sup>1</sup>, Almudena del Campo-Balguerías<sup>2</sup>, Juan Fernández-Baeza<sup>1</sup>, Luis F. Sánchez-Barba,<sup>3</sup> Andrés Garcés<sup>3</sup>, Carlos Alonso-Moreno<sup>2</sup>, José A. Castro-Osma<sup>2,\*</sup> and Agustín Lara-Sánchez<sup>1,\*</sup>*

<sup>1</sup> Universidad de Castilla-La Mancha, Departamento de Química Inorgánica, Orgánica y Bioquímica-Centro de Innovación en Química Avanzada (ORFEO-CINQA), Facultad de Ciencias y Tecnologías Químicas, 13071-Ciudad Real, Spain; e-mail: [Agustin.Lara@uclm.es](mailto:Agustin.Lara@uclm.es)

<sup>2</sup> Universidad de Castilla-La Mancha, Departamento de Química Inorgánica, Orgánica y Bioquímica-Centro de Innovación en Química Avanzada (ORFEO-CINQA), Facultad de Farmacia, 02071-Albacete, Spain. e-mail: [JoseAntonio.Castro@uclm.es](mailto:JoseAntonio.Castro@uclm.es).

<sup>3</sup> Universidad Rey Juan Carlos, Departamento de Biología y Geología, Física y Química Inorgánica, 28933-Móstoles, Spain.

\* Correspondence: [Agustin.Lara@uclm.es](mailto:Agustin.Lara@uclm.es), [JoseAntonio.Castro@uclm.es](mailto:JoseAntonio.Castro@uclm.es)

## Table of Contents

|                                                                                                 |     |
|-------------------------------------------------------------------------------------------------|-----|
| <b>Figure S1.</b> $^1\text{H}$ NMR spectrum of poly(PA- <i>alt</i> -CHO) (6)                    | S3  |
| <b>Figure S2.</b> $^{13}\text{C}\{^1\text{H}\}$ NMR spectrum of poly(PA- <i>alt</i> -CHO) (6)   | S3  |
| <b>Figure S3.</b> IR spectra of: a) poly(PA- <i>alt</i> -CHO) (6), b) PA (4)                    | S4  |
| <b>Figure S4.</b> $^1\text{H}$ NMR spectrum of poly(SA- <i>alt</i> -CHO) (11)                   | S5  |
| <b>Figure S5.</b> $^{13}\text{C}\{^1\text{H}\}$ NMR spectrum of poly(SA- <i>alt</i> -CHO) (11)  | S5  |
| <b>Figure S6.</b> IR spectra of: a) poly(SA- <i>alt</i> -CHO) (11), b) SA (8)                   | S6  |
| <b>Figure S7.</b> $^1\text{H}$ NMR spectrum of poly(MA- <i>alt</i> -CHO) (12)                   | S7  |
| <b>Figure S8.</b> $^{13}\text{C}\{^1\text{H}\}$ NMR spectrum of poly(MA- <i>alt</i> -CHO) (12)  | S7  |
| <b>Figure S9.</b> IR spectra of: a) poly(MA- <i>alt</i> -CHO) (12), b) MA (9)                   | S8  |
| <b>Figure S10.</b> $^1\text{H}$ NMR spectrum of poly(NA- <i>alt</i> -CHO) (13)                  | S9  |
| <b>Figure S11.</b> $^{13}\text{C}\{^1\text{H}\}$ NMR spectrum of poly(NA- <i>alt</i> -CHO) (13) | S9  |
| <b>Figure S12.</b> IR spectra of: a) poly(NA- <i>alt</i> -CHO) (13), b) NA (10)                 | S10 |
| <b>Figure S13.</b> GPC profile of poly(PA- <i>alt</i> -CHO) (6)                                 | S11 |
| <b>Figure S14.</b> MALDI-ToF spectrum of poly(PA- <i>alt</i> -CHO) (6)                          | S12 |
| <b>Figure S15.</b> TGA analysis of poly(PA- <i>alt</i> -CHO) (6)                                | S13 |
| <b>Figure S16.</b> DSC analysis of poly(PA- <i>alt</i> -CHO) (6)                                | S13 |
| <b>Figure S17.</b> TGA analysis of poly(SA- <i>alt</i> -CHO) (11)                               | S14 |
| <b>Figure S18.</b> DSC analysis of poly(SA- <i>alt</i> -CHO) (11)                               | S14 |
| <b>Figure S19.</b> TGA analysis of poly(MA- <i>alt</i> -CHO) (12)                               | S15 |
| <b>Figure S20.</b> DSC analysis of poly(MA- <i>alt</i> -CHO) (12)                               | S15 |
| <b>Figure S21.</b> TGA analysis of poly(NA- <i>alt</i> -CHO) (13)                               | S16 |
| <b>Figure S22.</b> DSC analysis of poly(NA- <i>alt</i> -CHO) (13)                               | S16 |

**Figure S1.**  $^1\text{H}$  NMR spectrum of poly(PA-*alt*-CHO) (6)

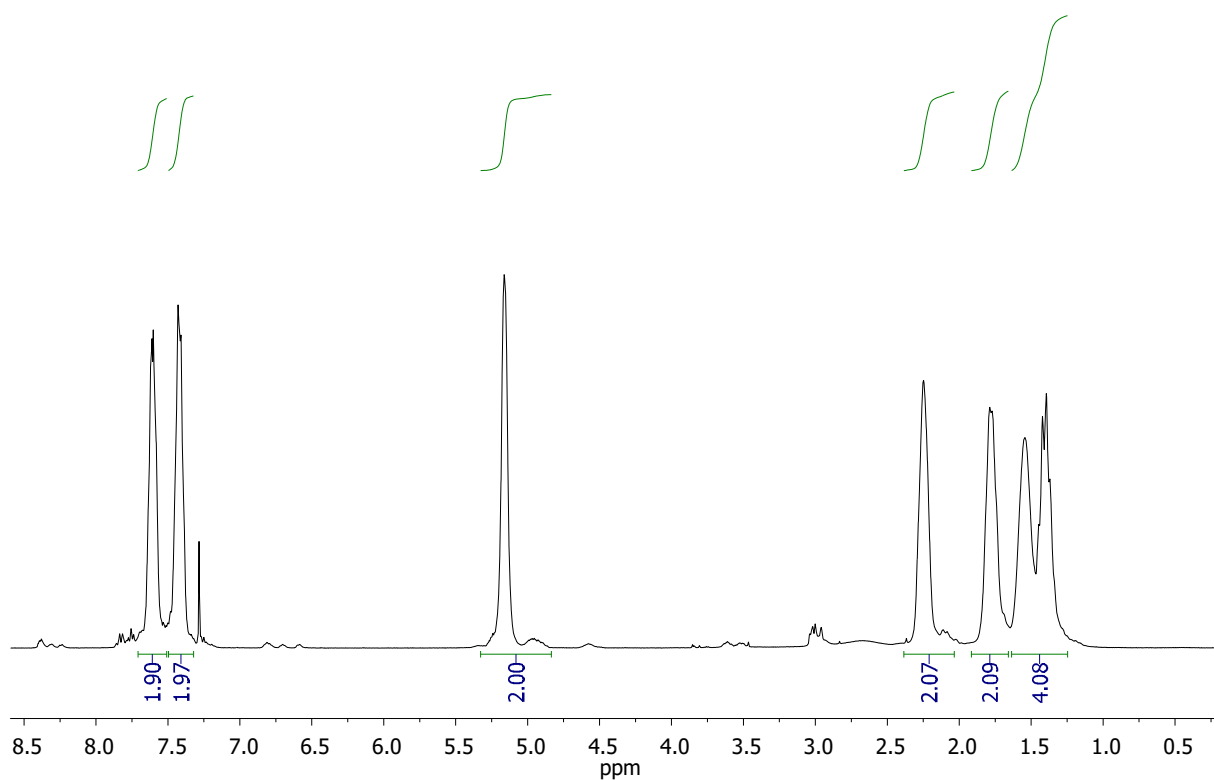

**Figure S2.**  $^{13}\text{C}\{^1\text{H}\}$  NMR spectrum of poly(PA-*alt*-CHO) (6)

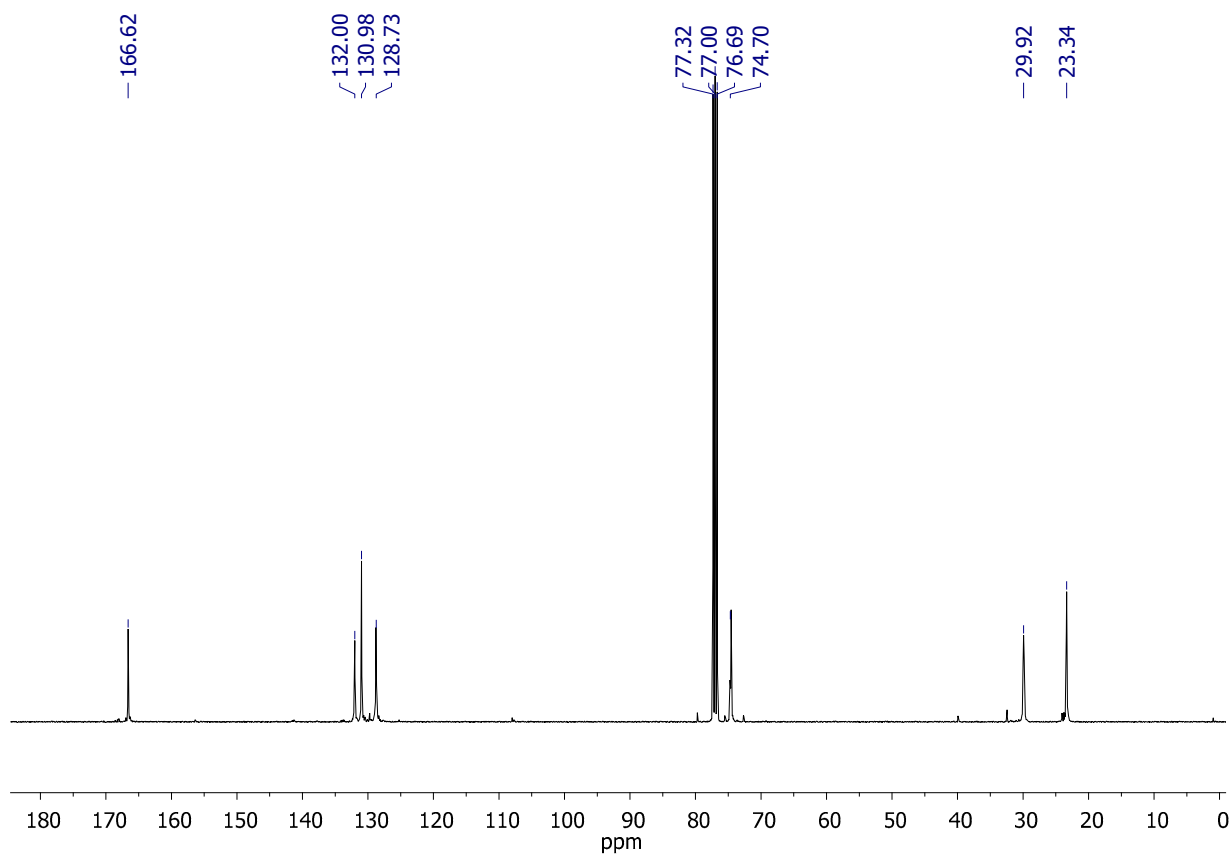

**Figure S3.** IR spectra of: a) poly(PA-*alt*-CHO) (6), b) PA (4)

**a)**

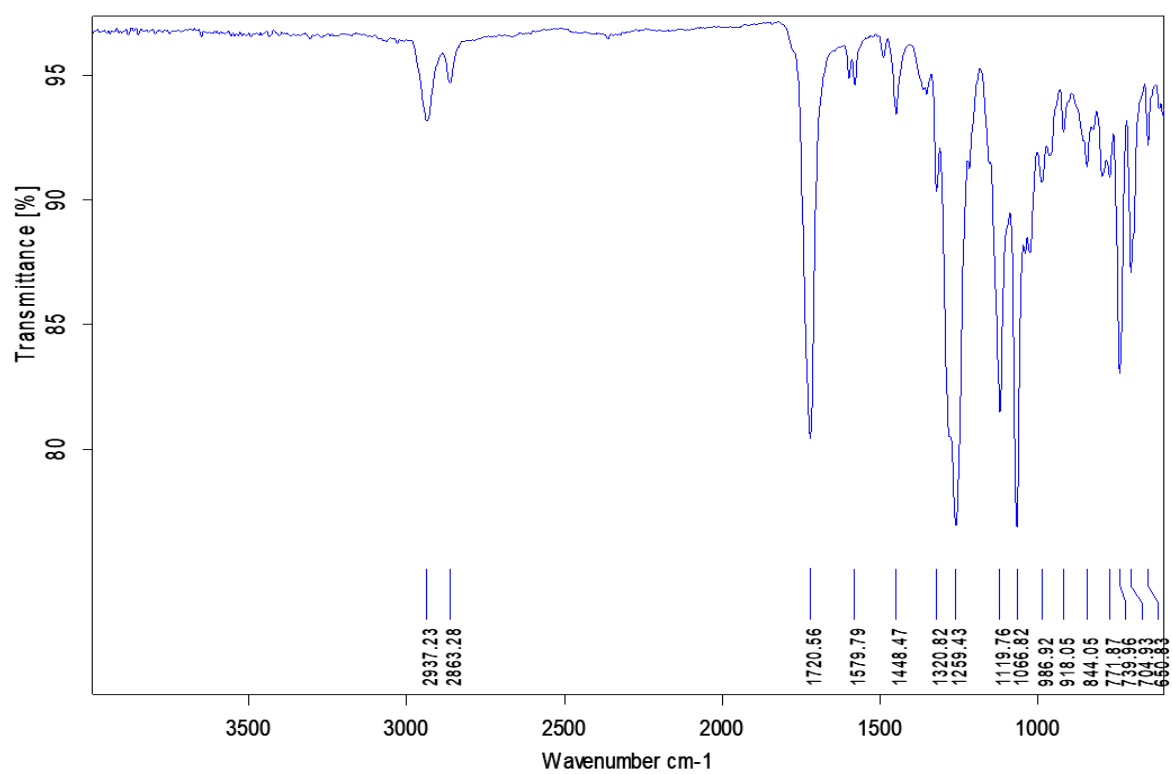

**b)**

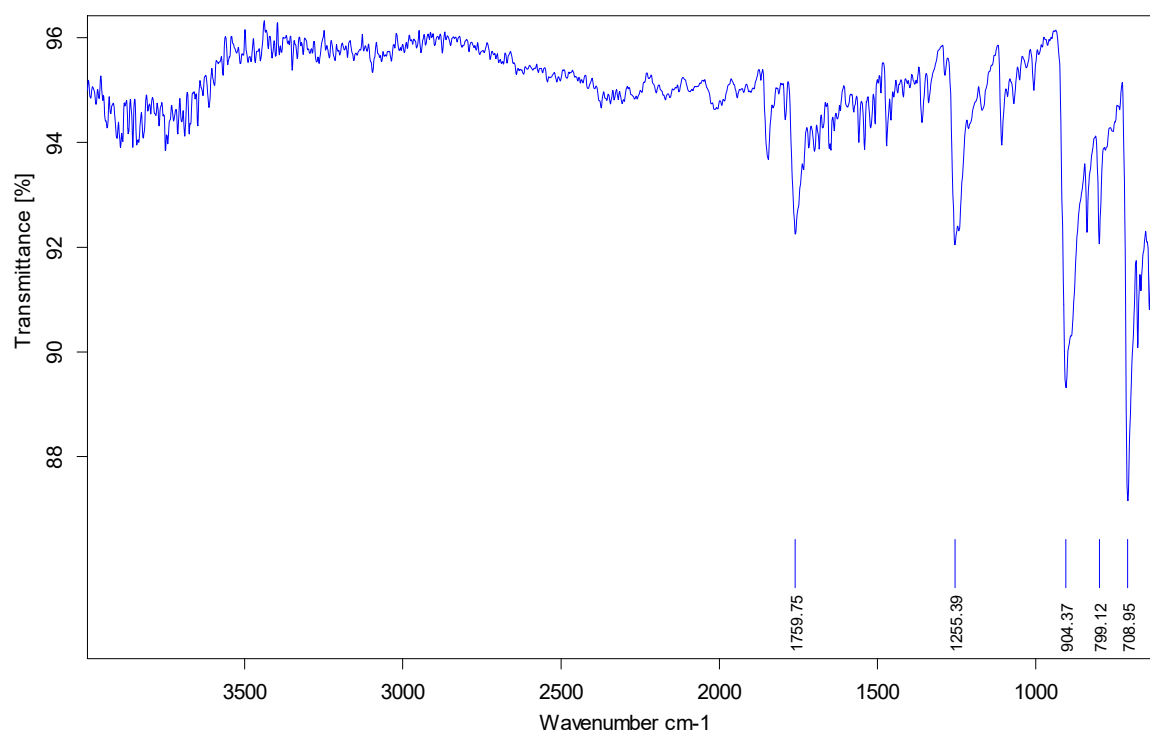

**Figure S4.**  $^1\text{H}$  NMR spectrum of poly(SA-*alt*-CHO) (**11**)

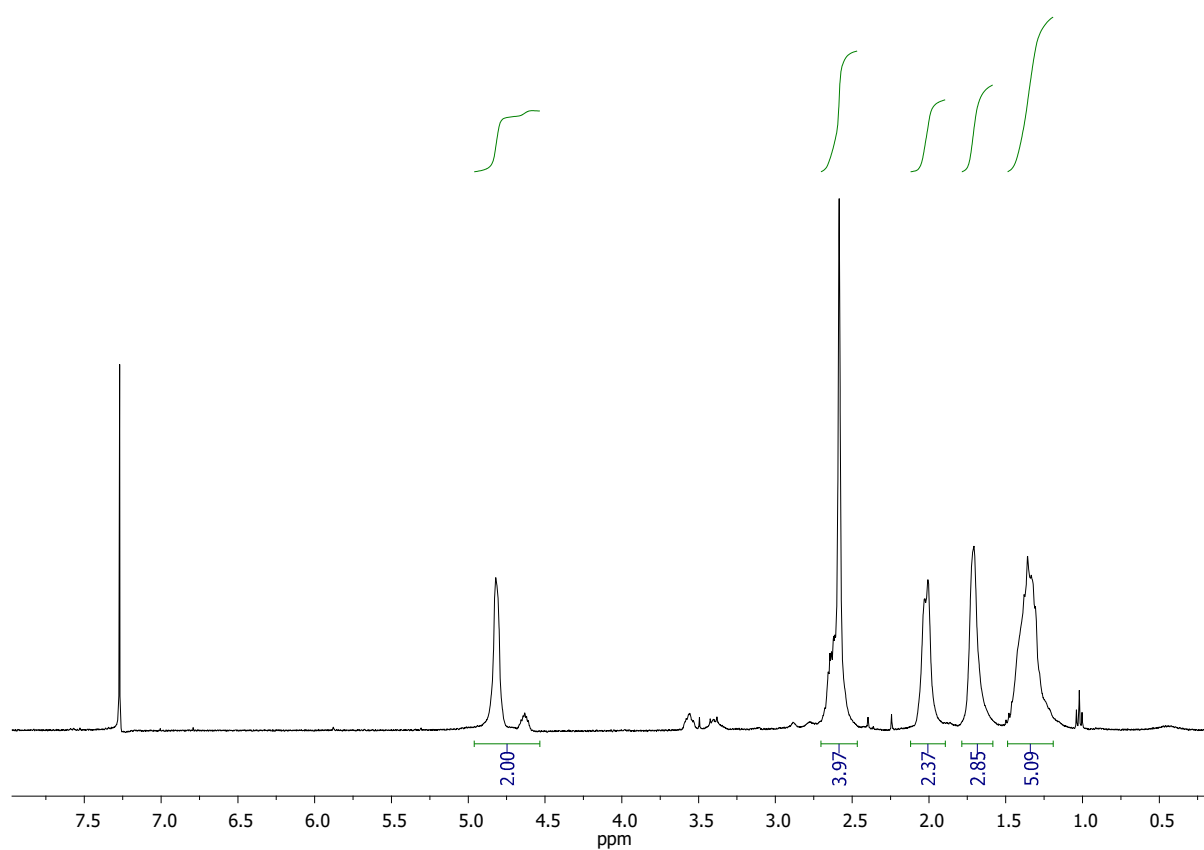

**Figure S5.**  $^{13}\text{C}\{^1\text{H}\}$  NMR spectrum of poly(SA-*alt*-CHO) (**11**)

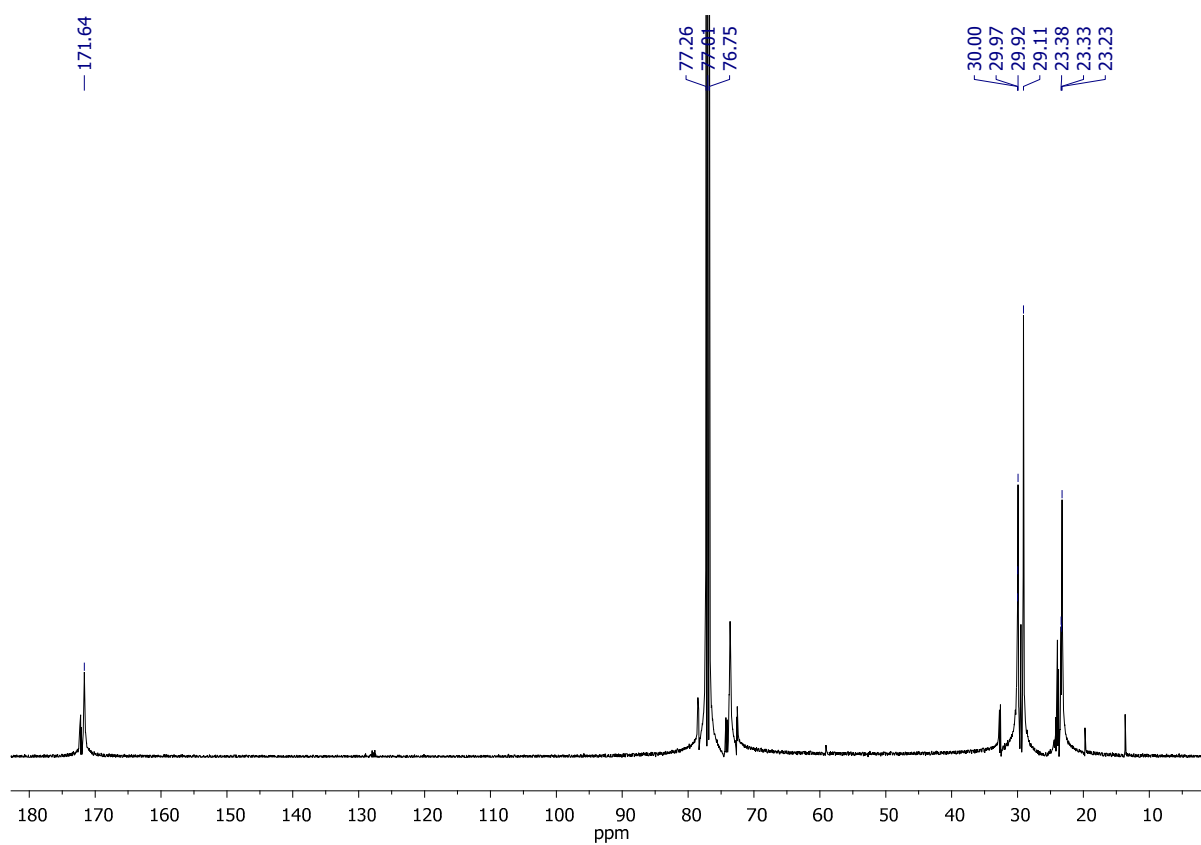

**Figure S6.** IR spectra of: a) poly(SA-*alt*-CHO) (**11**), b) SA (**8**)

**a)**

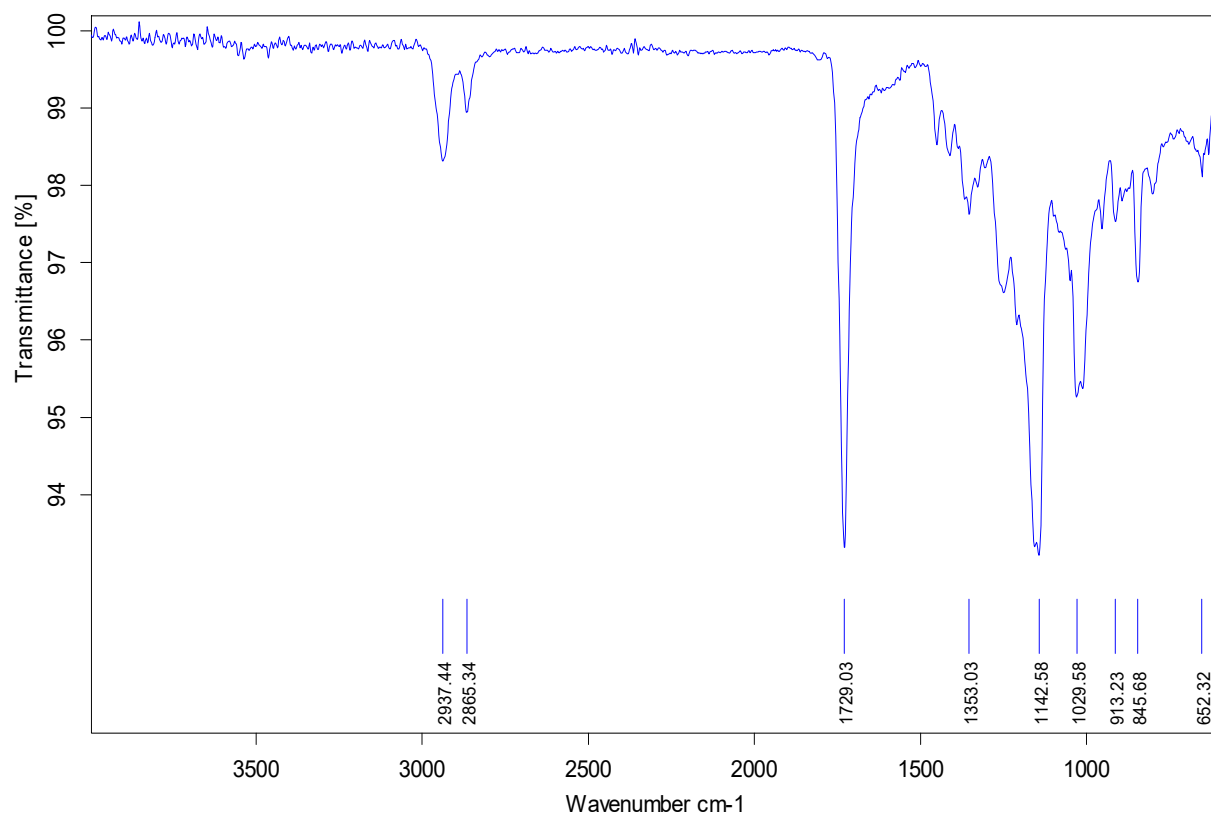

**b)**

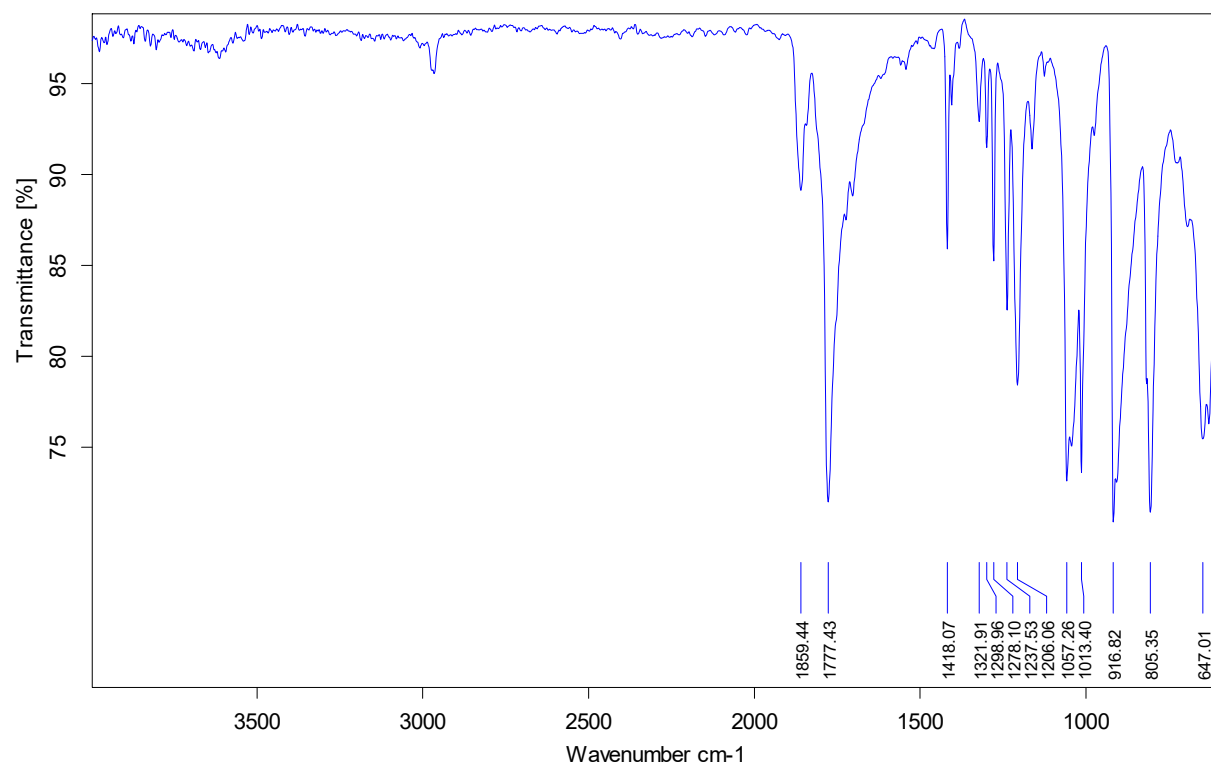

**Figure S7.**  $^1\text{H}$  NMR spectrum of poly(MA-*alt*-CHO) (**12**)

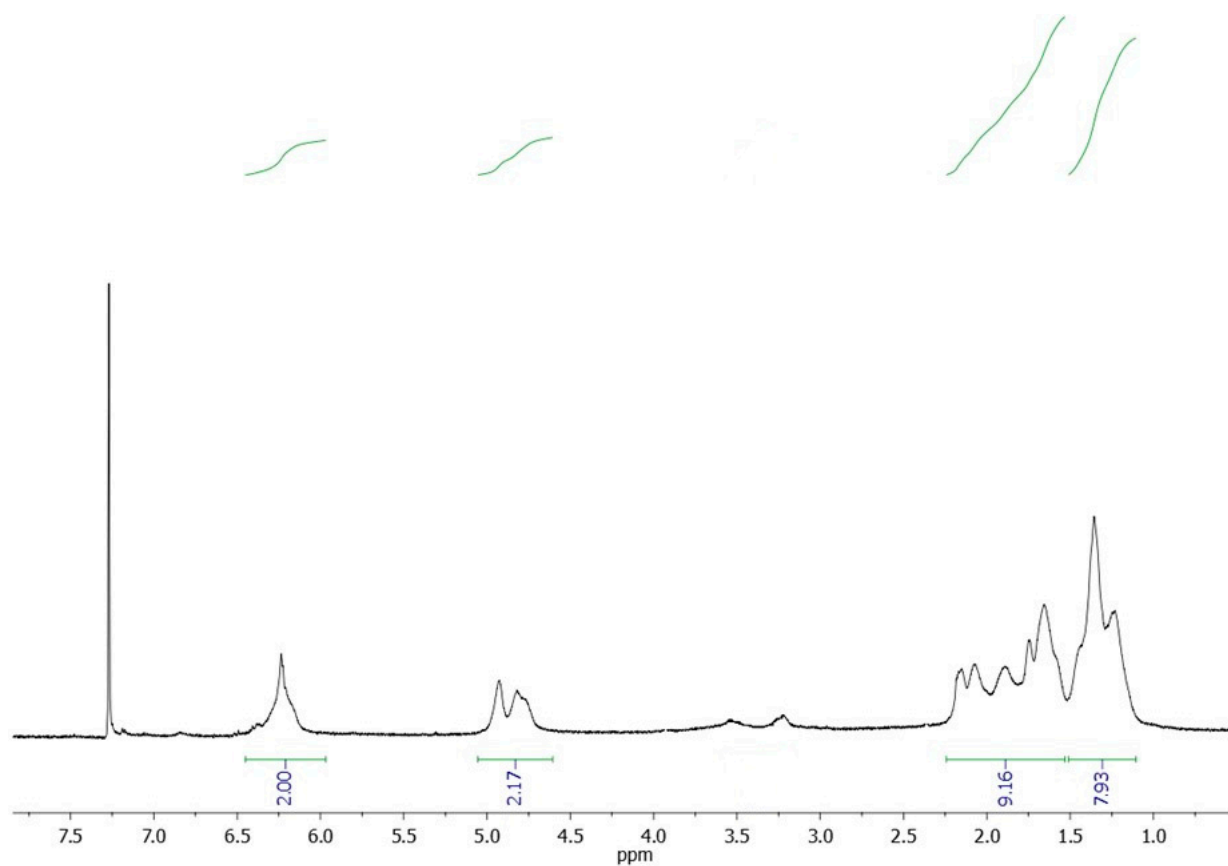

**Figure S8.**  $^{13}\text{C}\{^1\text{H}\}$  NMR spectrum of poly(MA-*alt*-CHO) (**12**)

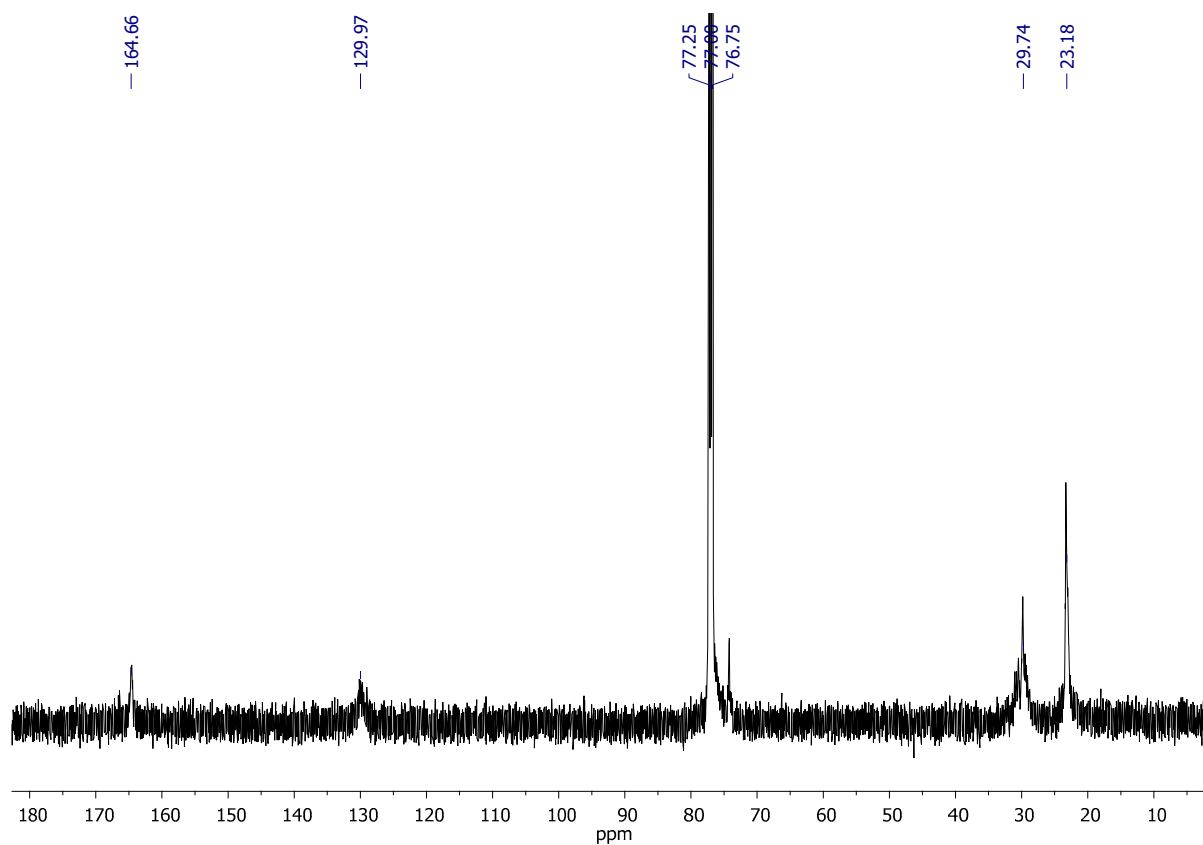

**Figure S9.** IR spectra of: a) poly(MA-*alt*-CHO) (**12**), b) MA (**9**)

**a)**

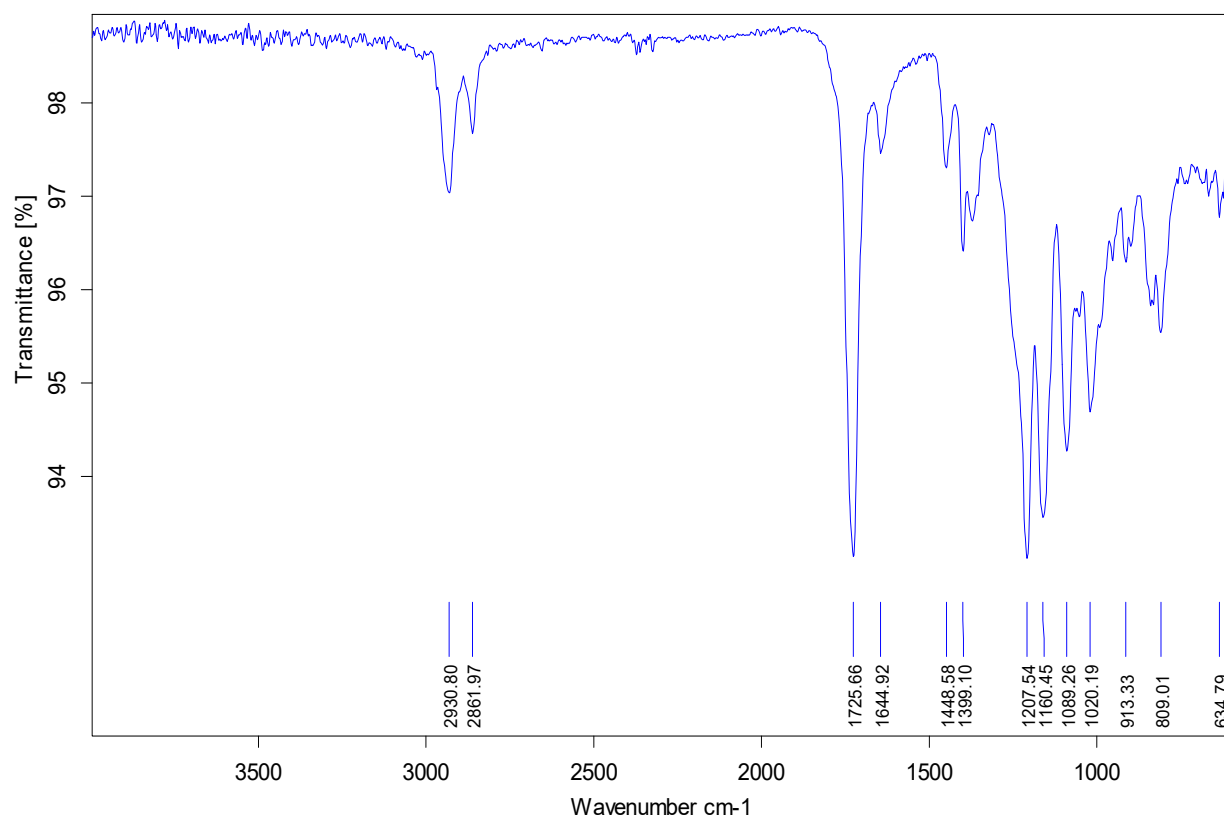

**b)**

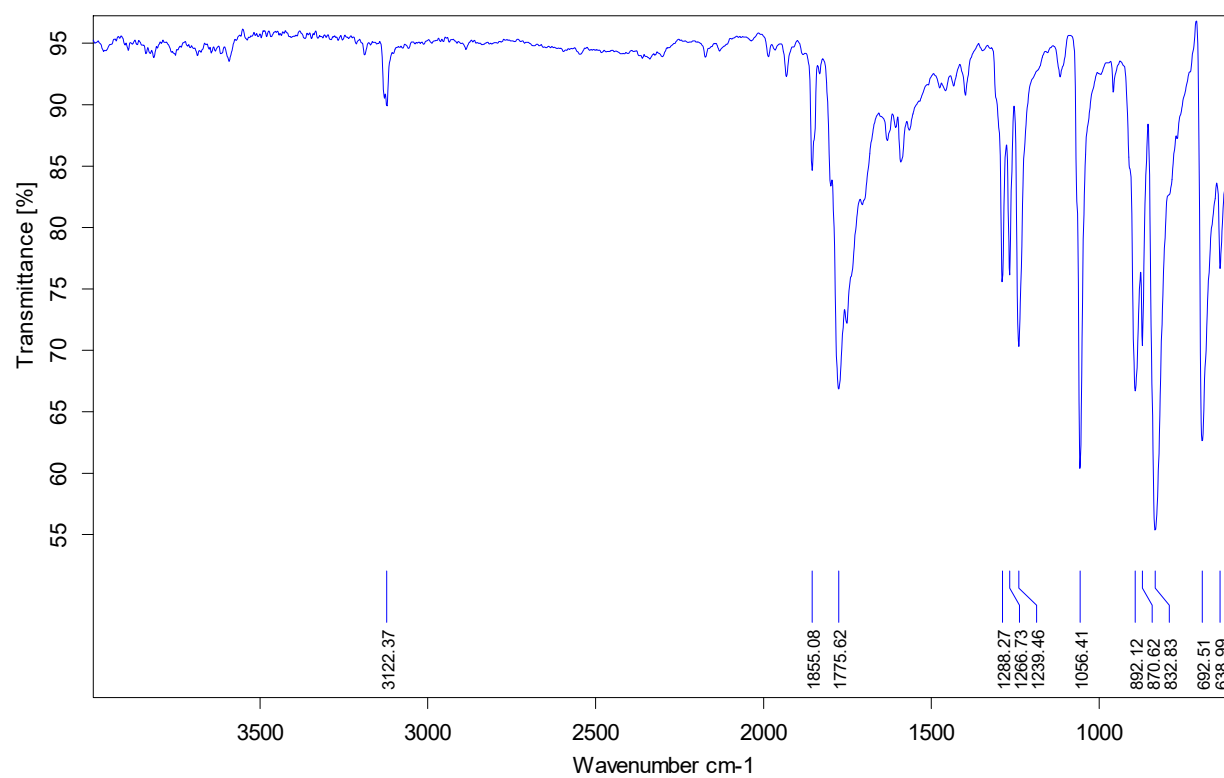



**Figure S10.**  $^1\text{H}$  NMR spectrum of poly(NA-*alt*-CHO) (**13**)

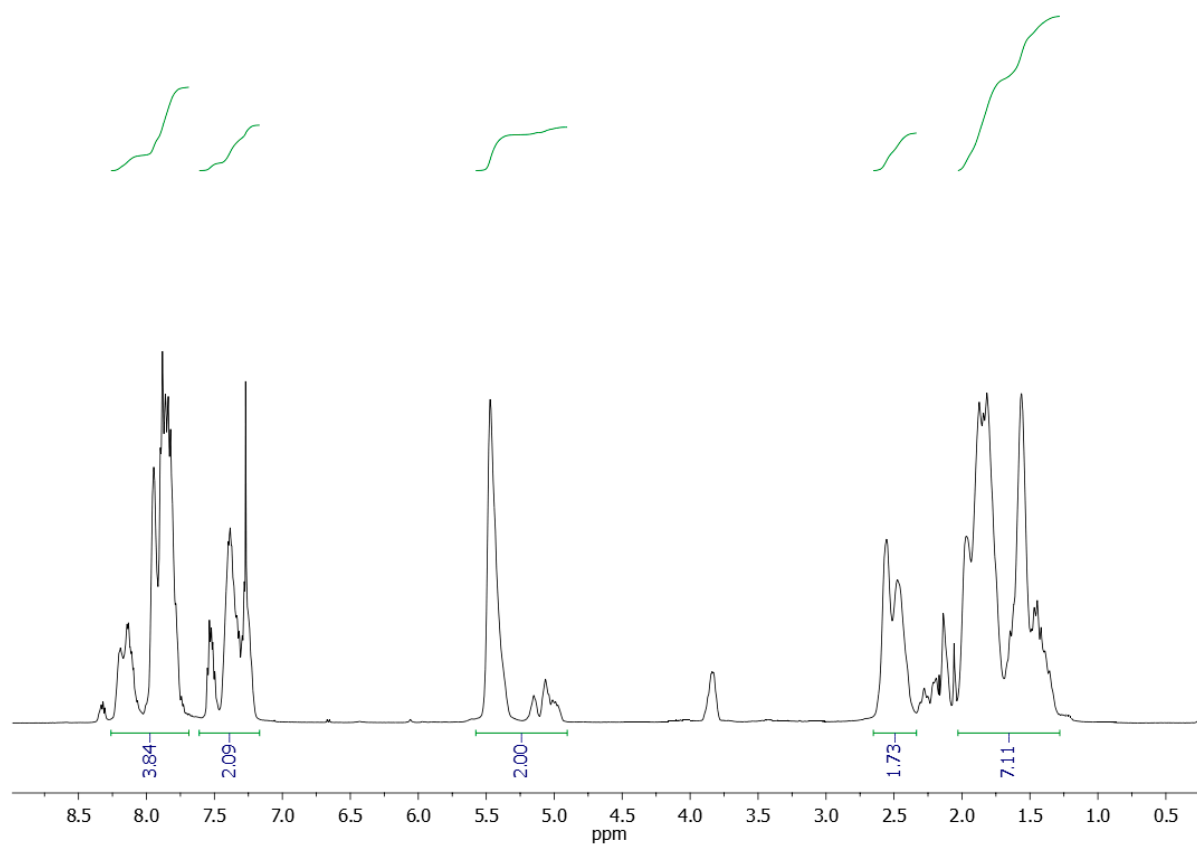

**Figure S11.**  $^{13}\text{C}\{^1\text{H}\}$  NMR spectrum of poly(NA-*alt*-CHO) (**13**)

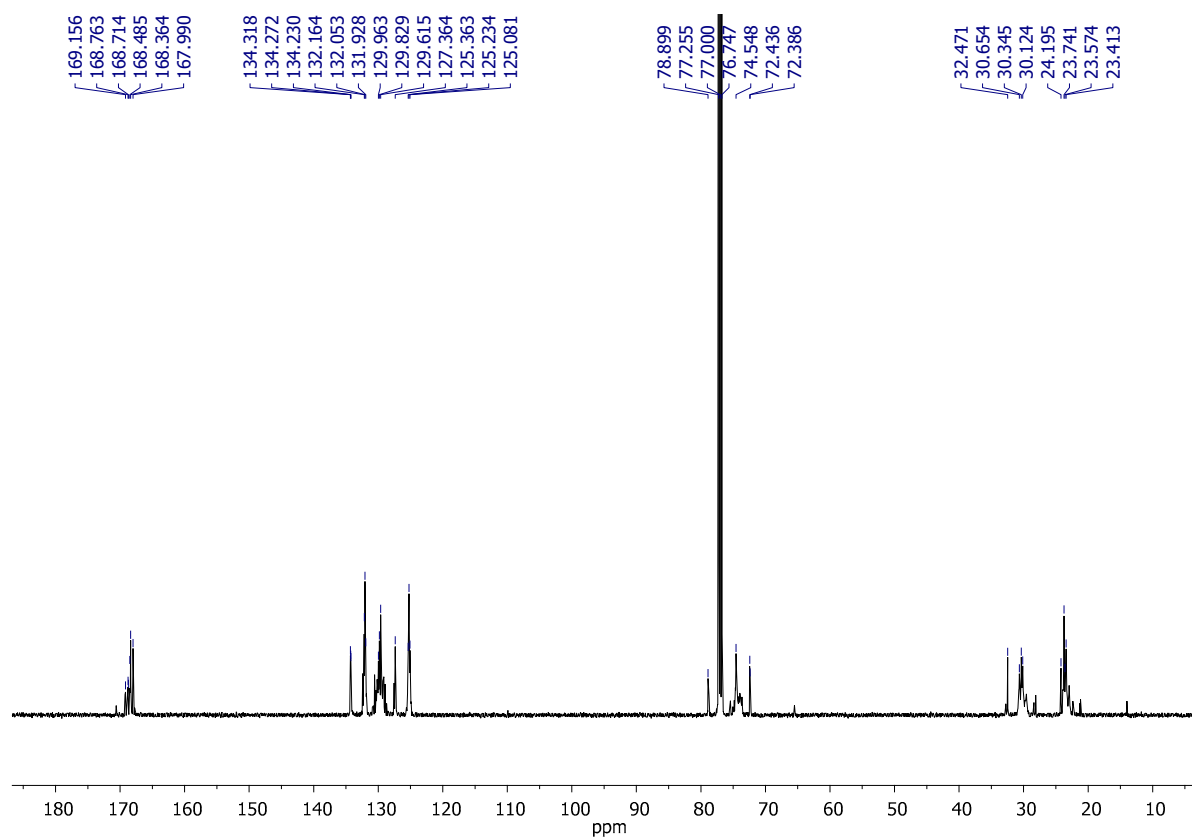

**Figure S12.** IR spectra of: a) poly(NA-*alt*-CHO) (**13**), b) NA (**10**)

**a)**

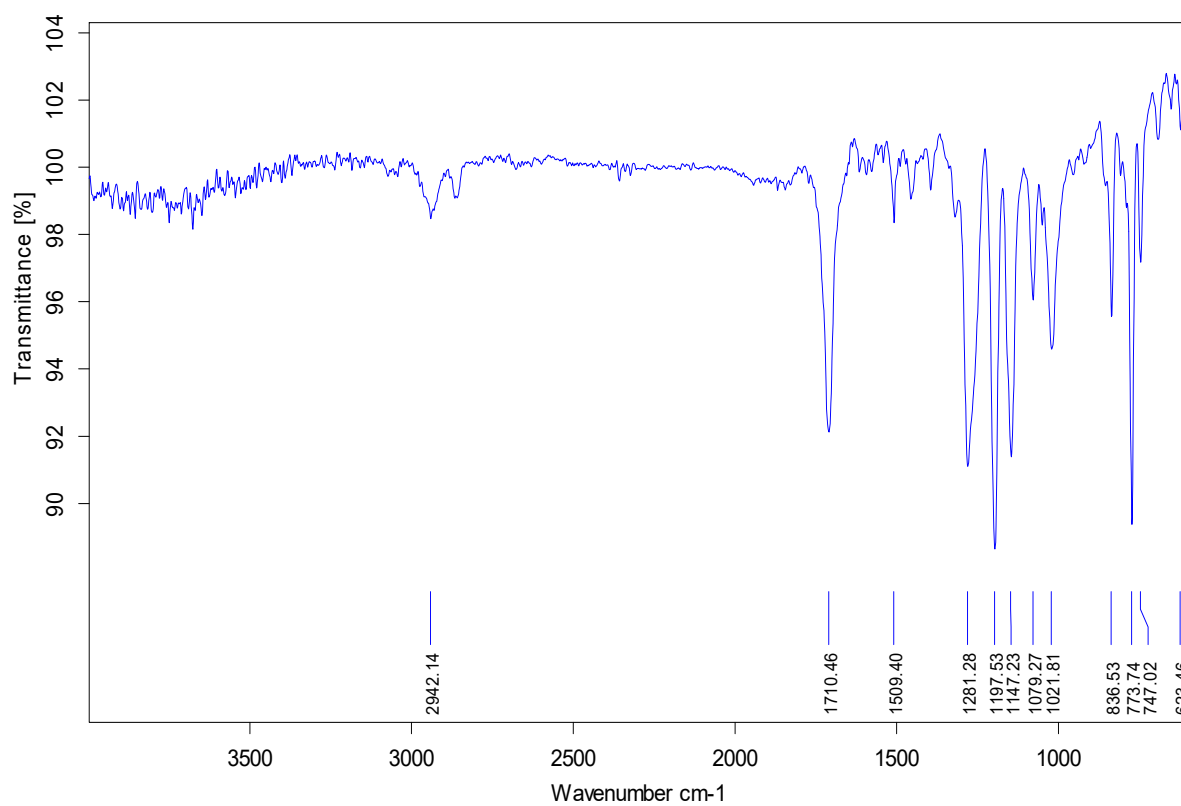

**b)**

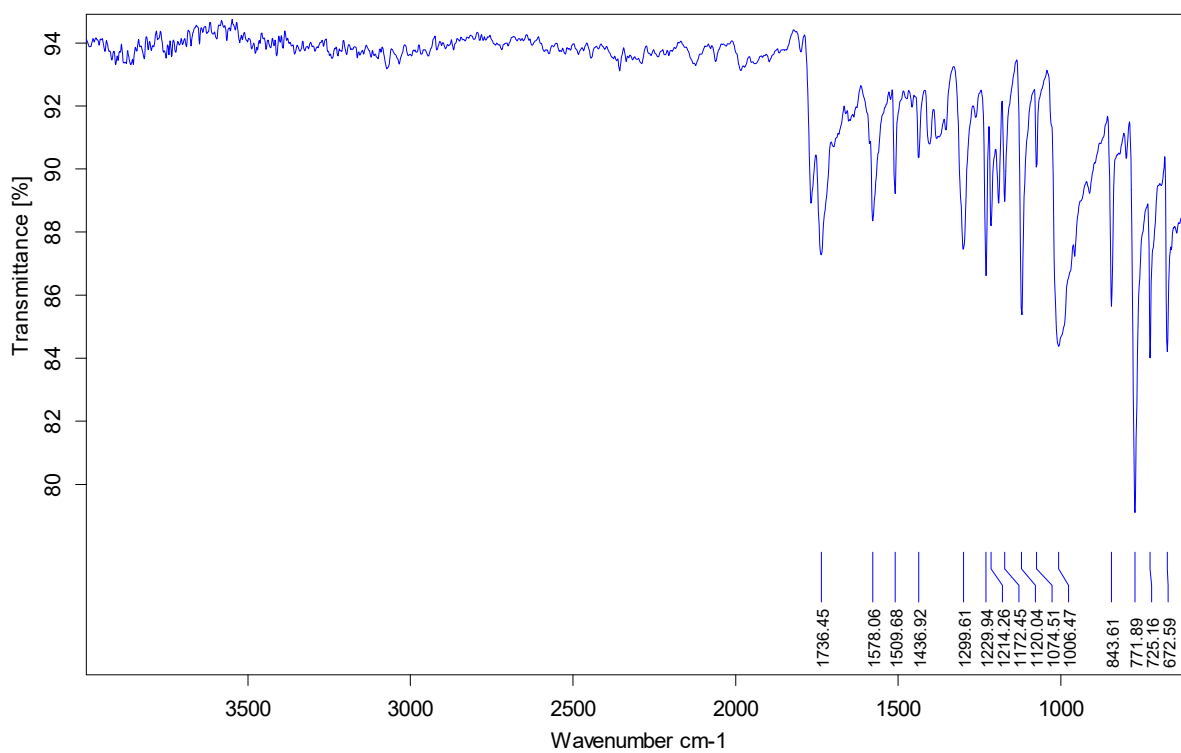

**Figure S13.** GPC profile of poly(PA-*alt*-CHO) (6)

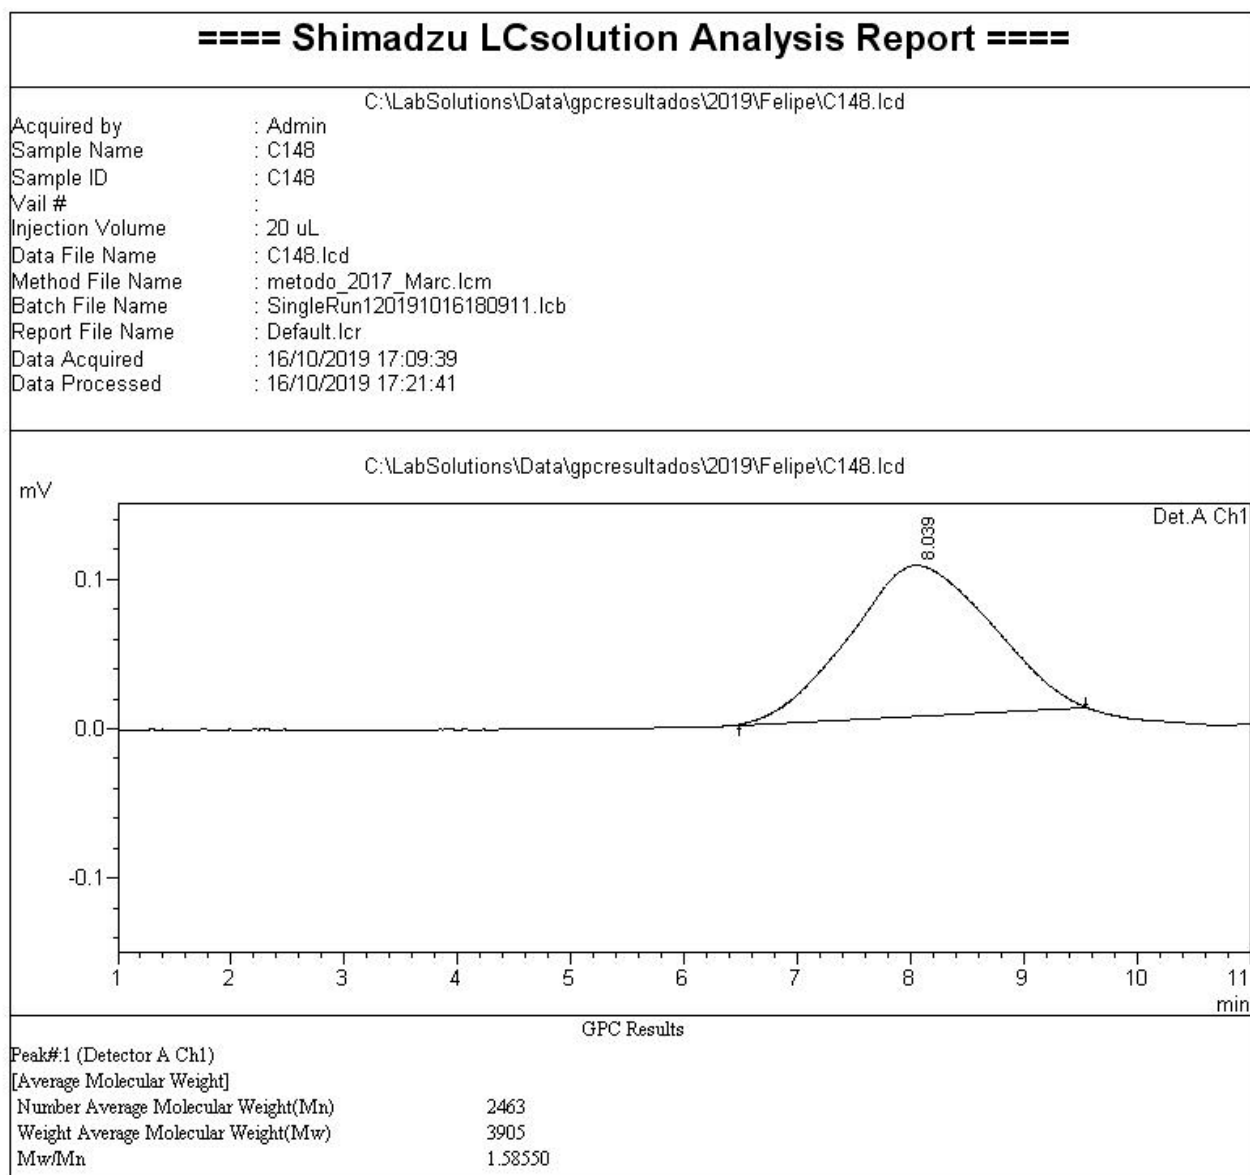

**Figure S14.** MALDI-ToF spectrum of poly(PA-*alt*-CHO) (6)

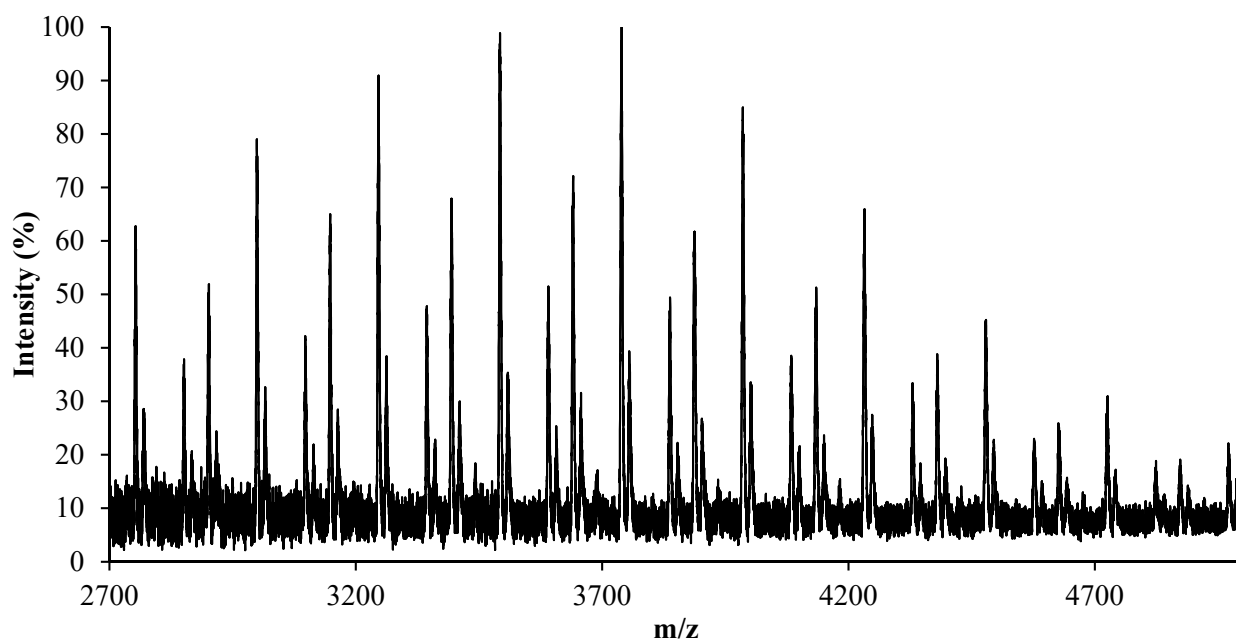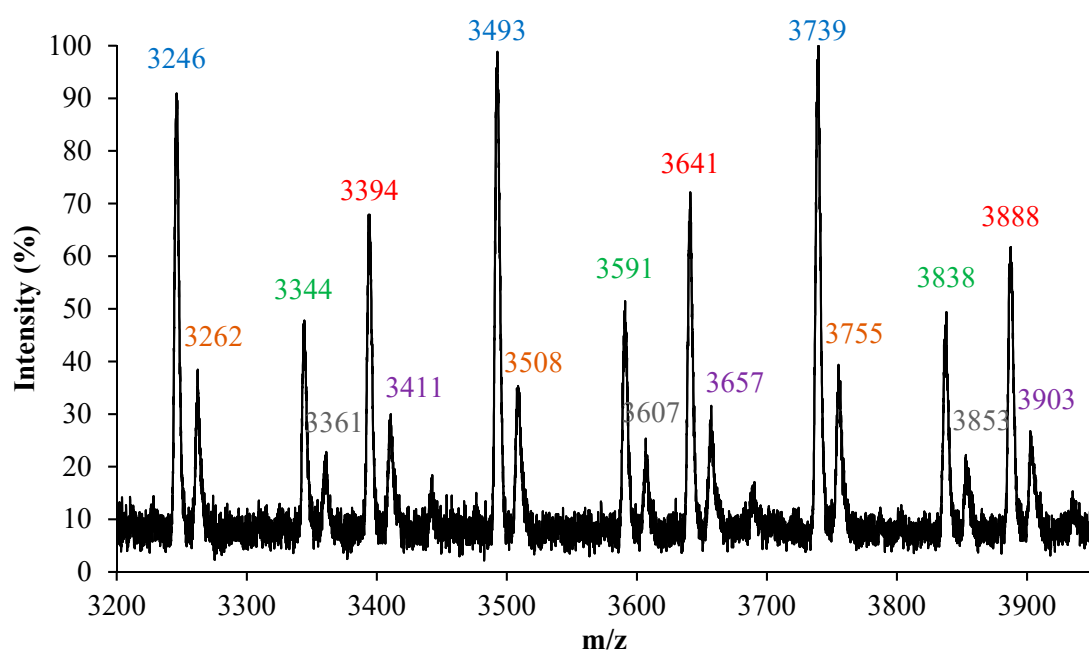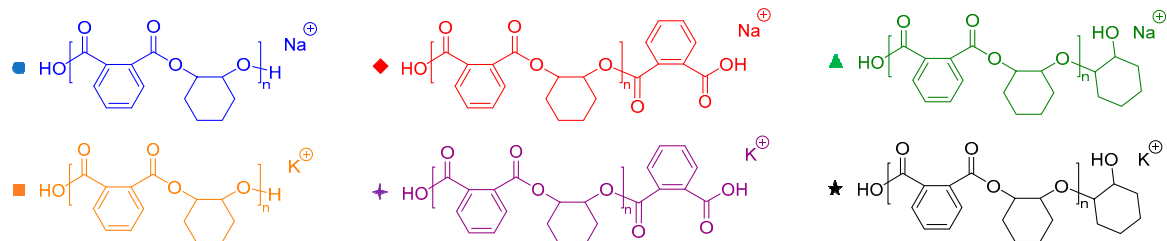

**Figure S15.** TGA analysis of poly(PA-*alt*-CHO) (6)

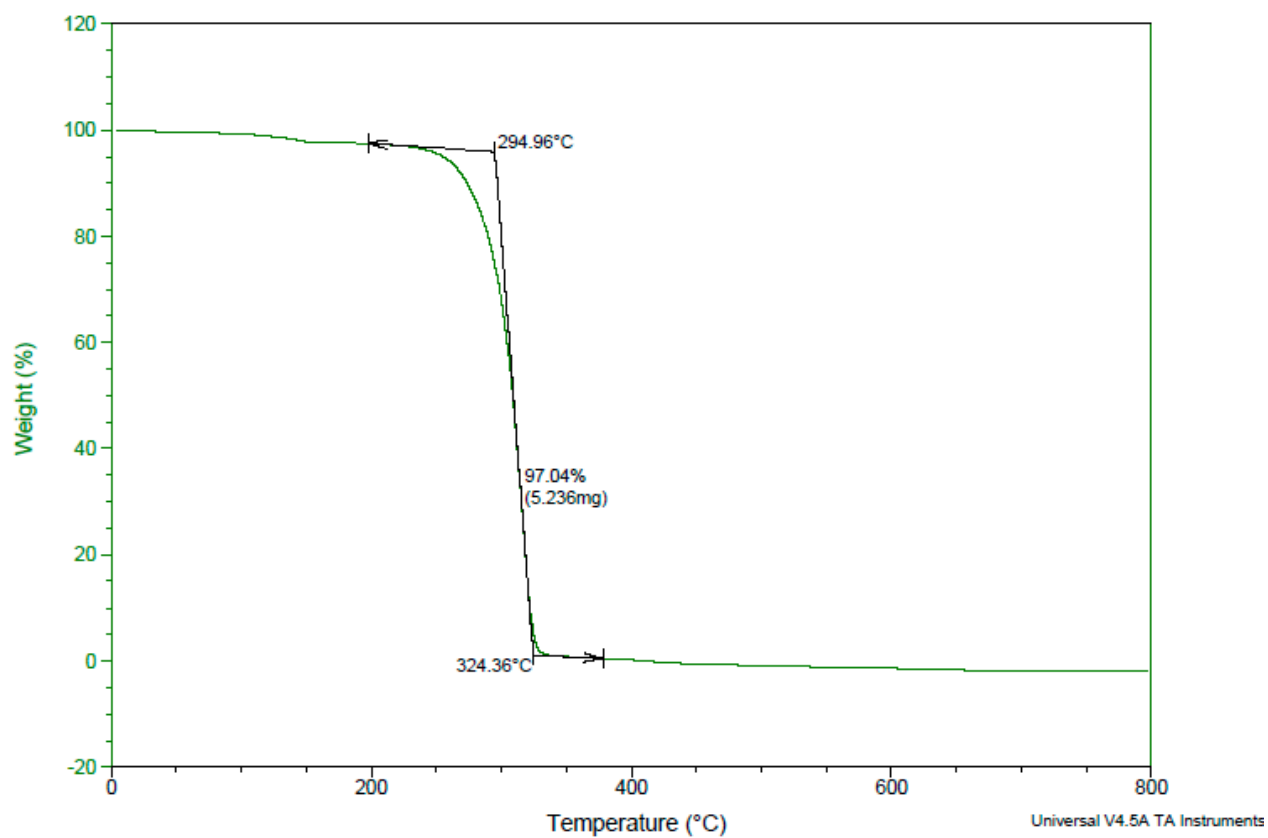

**Figure S16.** DSC analysis of poly(PA-*alt*-CHO) (6)

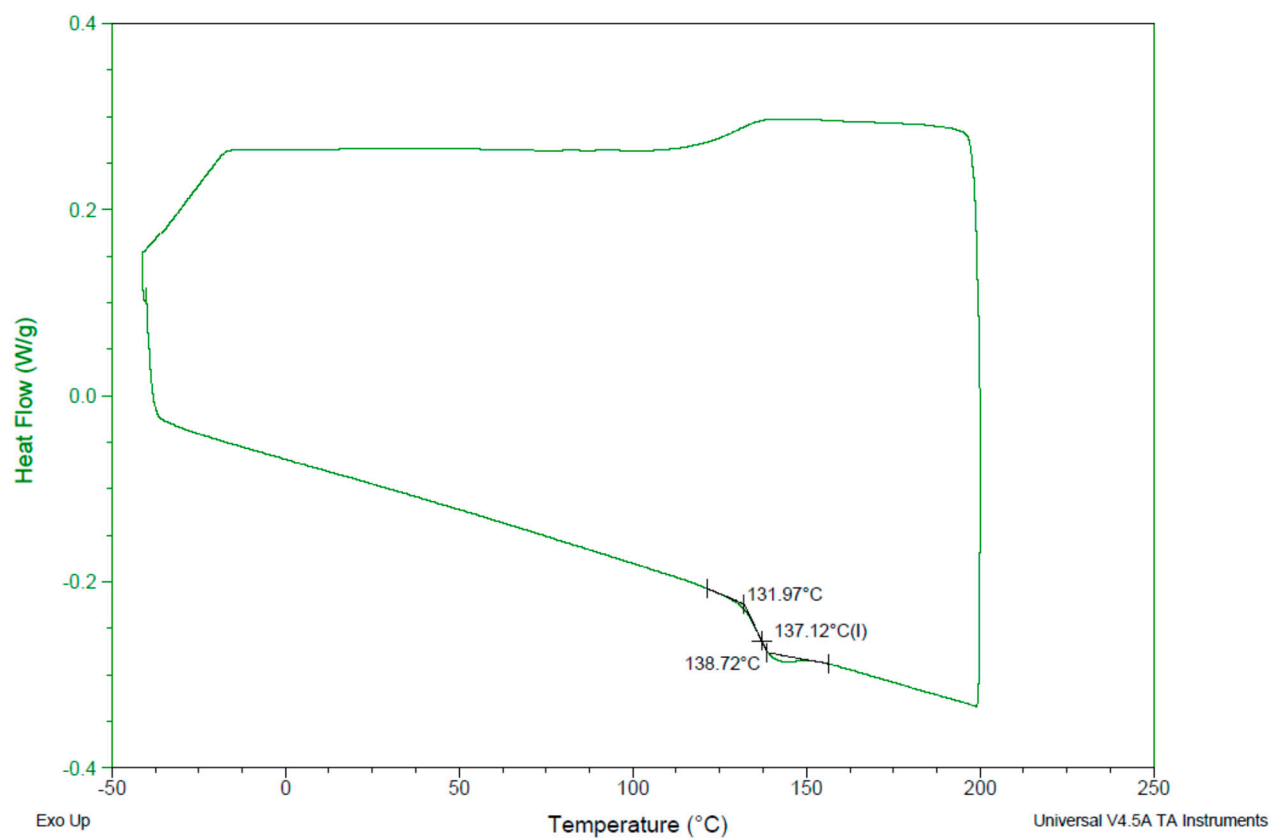

**Figure S17.** TGA analysis of poly(SA-*alt*-CHO) (**11**)

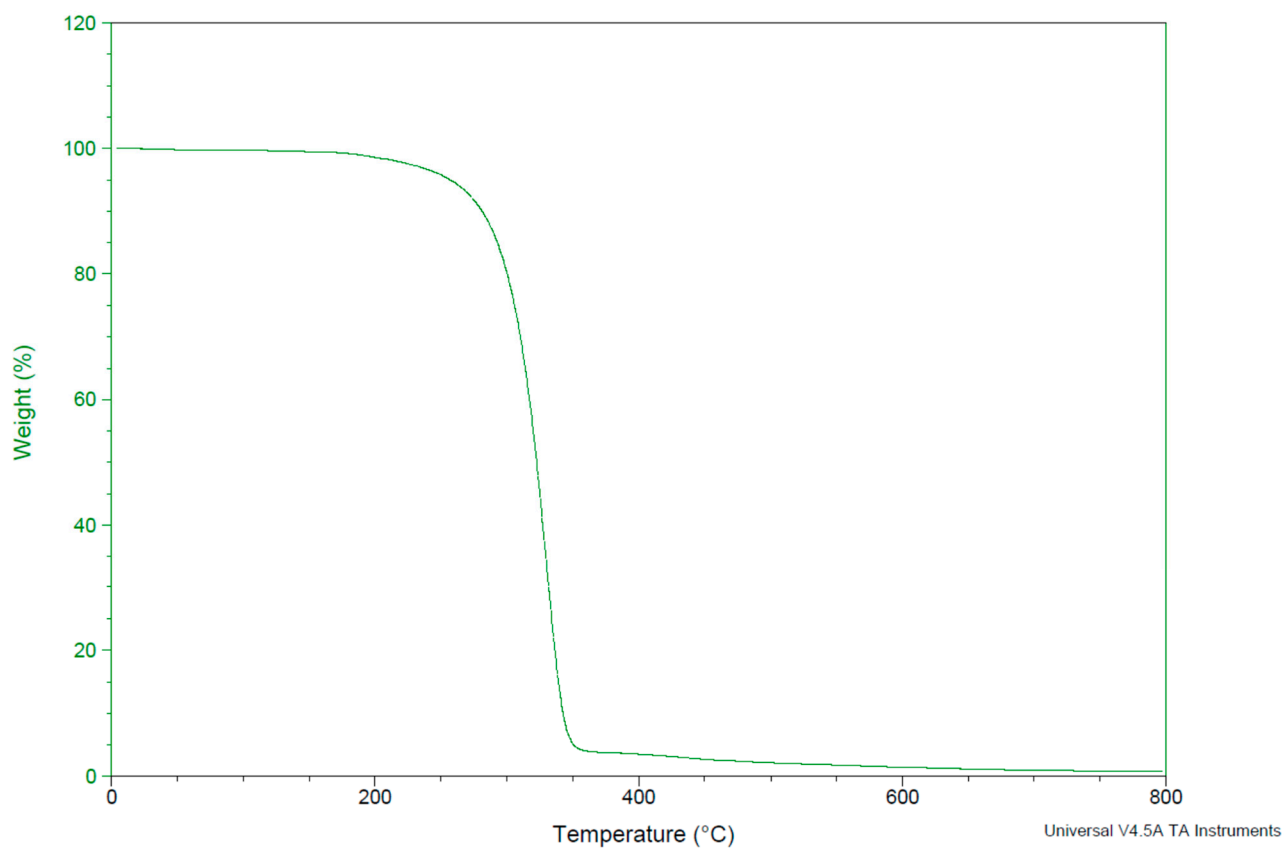

**Figure S18.** DSC analysis of poly(SA-*alt*-CHO) (**11**)

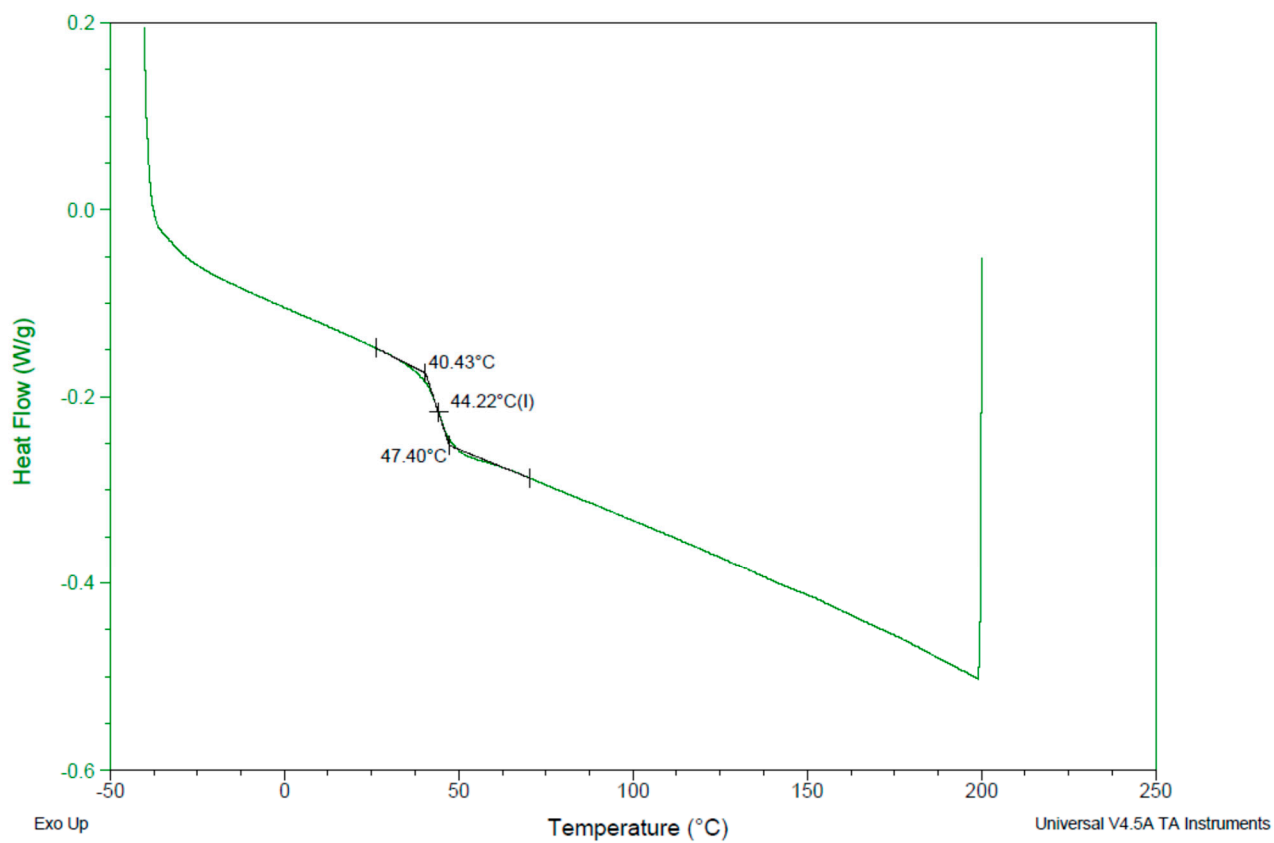

**Figure S19.** TGA analysis of poly(MA-*alt*-CHO) (**12**)

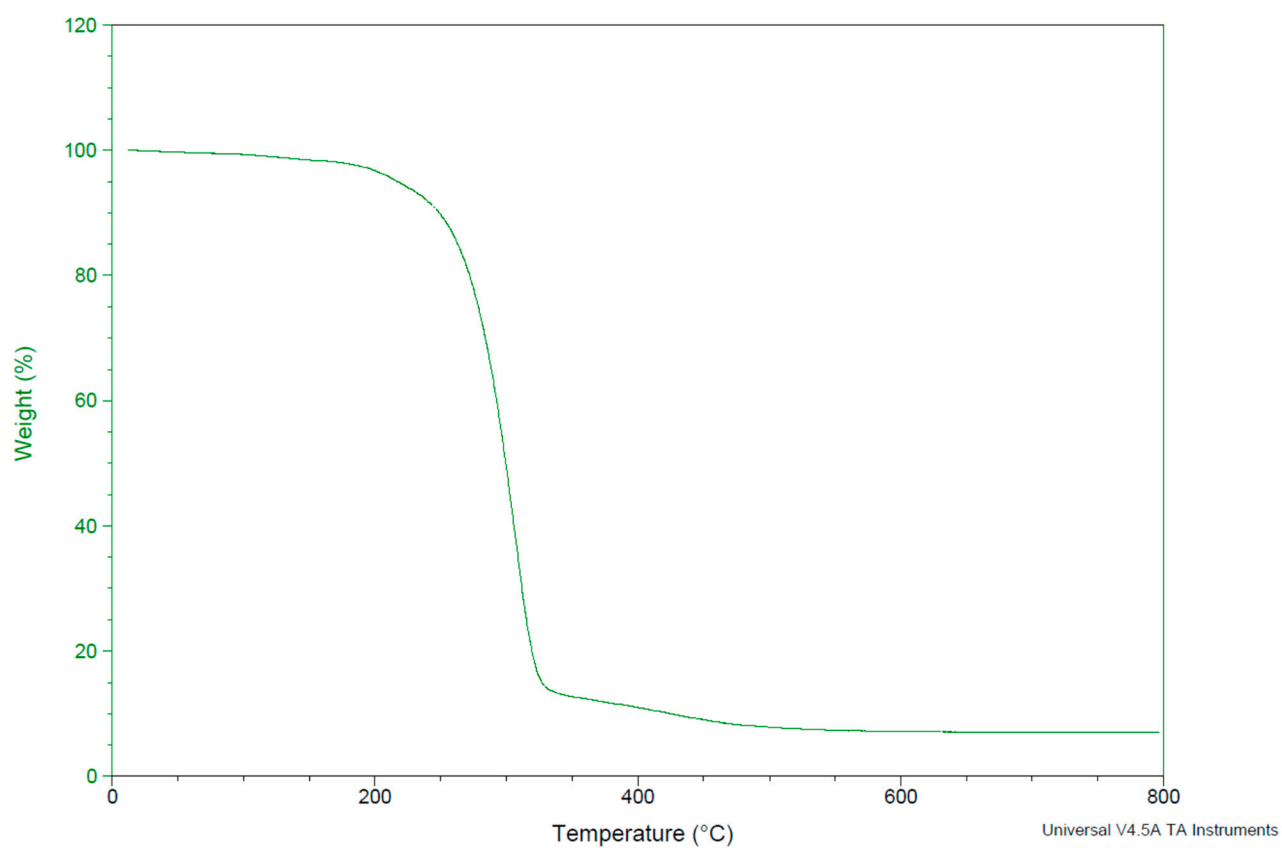

**Figure S20.** DSC analysis of poly(MA-*alt*-CHO) (**12**)

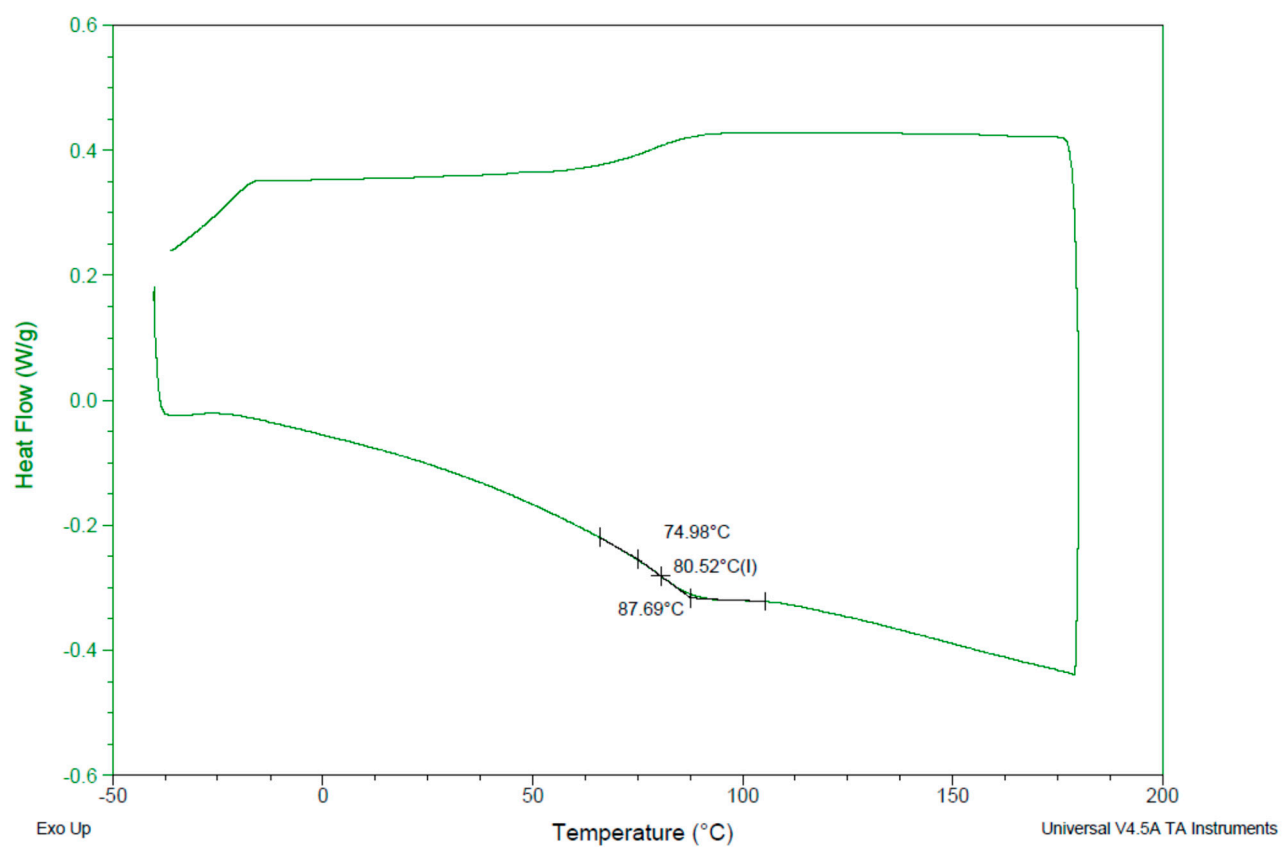

**Figure S21.** TGA analysis of poly(NA-*alt*-CHO) (**13**)

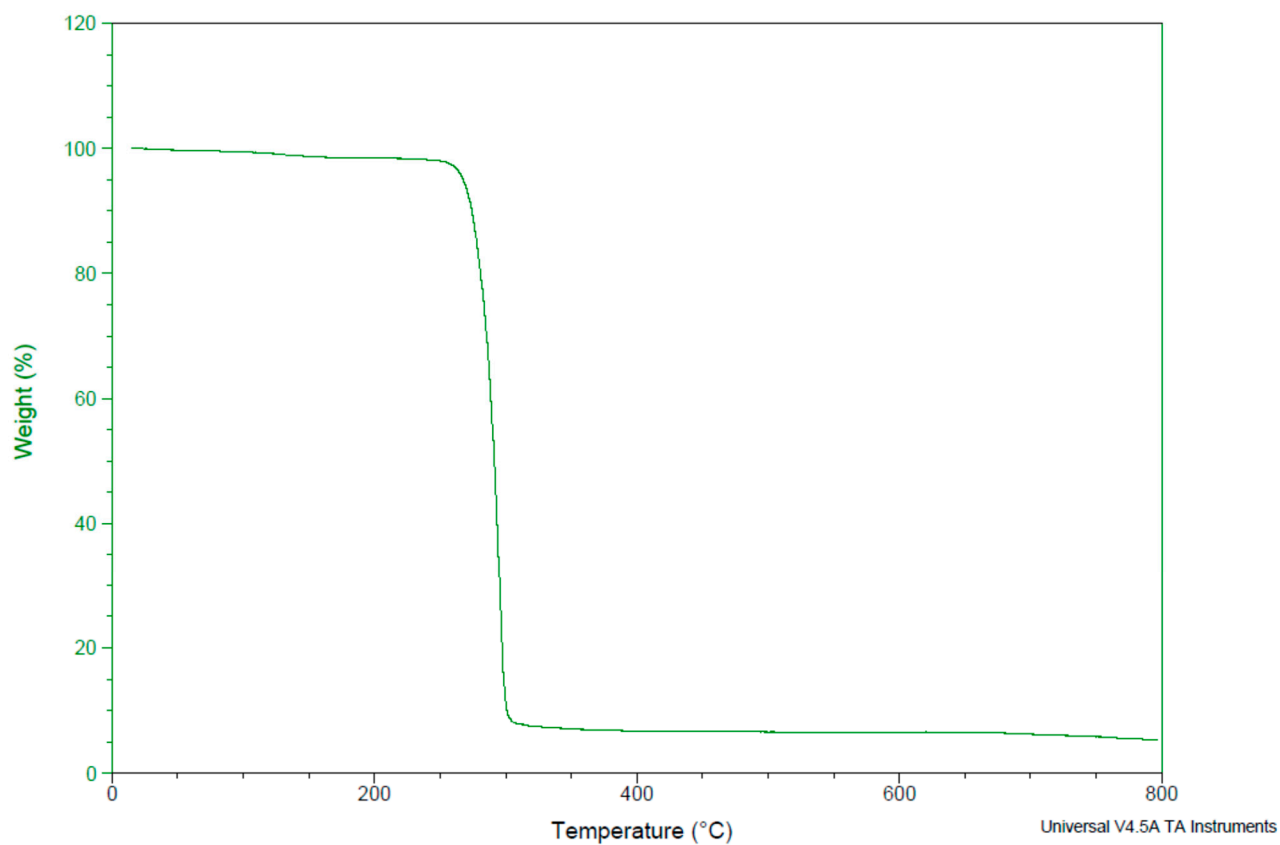

**Figure S22.** DSC analysis of poly(NA-*alt*-CHO) (**13**)

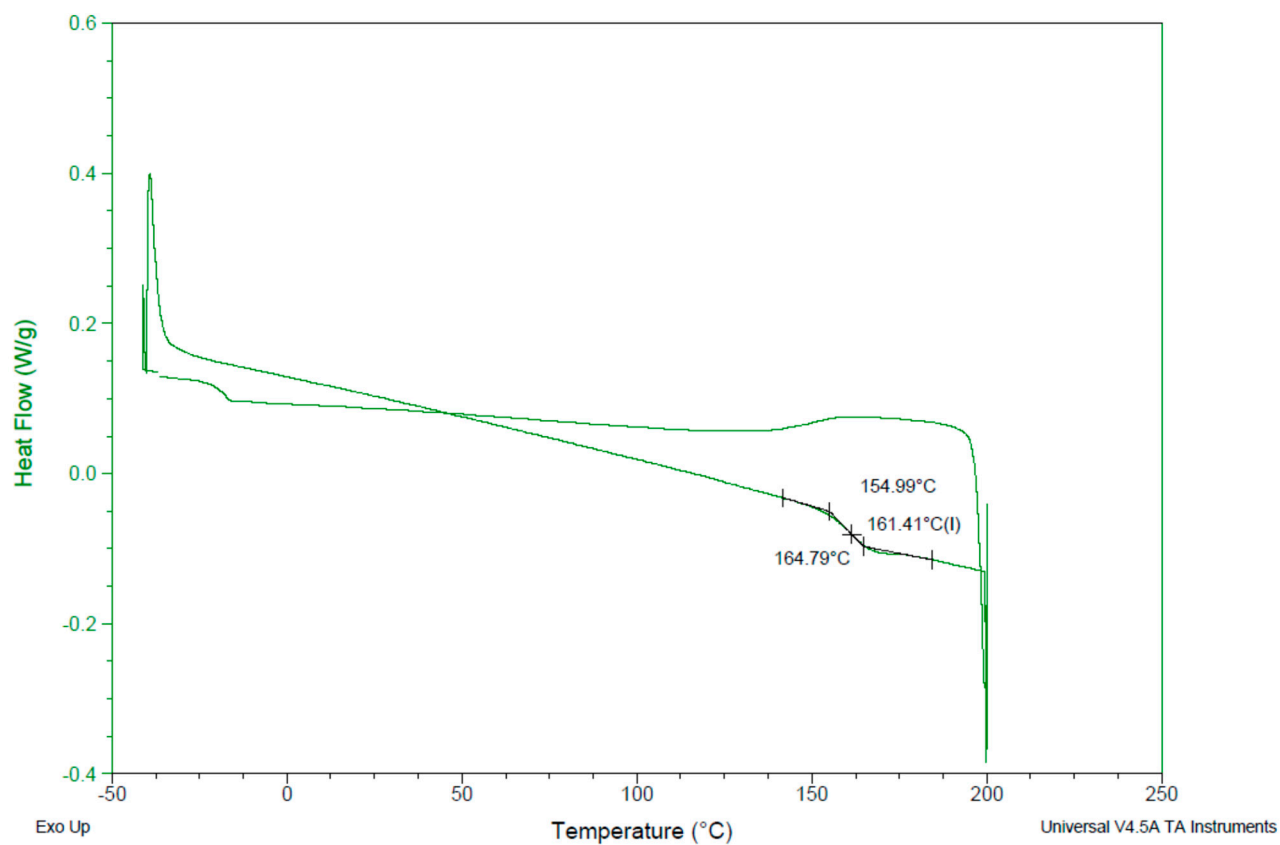

Supplement: s1 [file s1]
